# Supplementary material for: Concordance Between Measured and Self-Perceived Weight Status of Persons With Serious Mental Illness
Source: Atypon-hosted journal article supplement (doi:10.1176/appi.ps.201100515), 2013-01-01
Supplement: 91_ds001.pdf [file 91_ds001.pdf]

Table: Demographic predictors of accuracy of weight perception  
(accurate; moderately inaccurate; grossly inaccurate) based on cumulative logit model (N=547)

| Independent Variable               | OR (95% CI)       | Wald $\chi^2$ | P-value |
|------------------------------------|-------------------|---------------|---------|
| Ethnicity/Race                     |                   |               |         |
| Non Latino White                   | 1 (Reference)     |               |         |
| African American                   | .84 (0.57-1.24)   | 0.5           | ns      |
| Latino                             | .92 (0.60-1.41)   | 0.01          | ns      |
| Gender                             |                   |               |         |
| Male                               | 1 (Reference)     |               |         |
| Female                             | 2.08 (1.48-2.92)  | 18.01         | 0.001   |
| Age                                | 1.01 (.998-1.02)  | 2.65          | 0.103   |
| Education                          |                   |               |         |
| Some college                       | 1 (Reference)     |               |         |
| High school or less                | .59 (0.401-0.861) | 7.43          | 0.006   |
| Diagnosis                          |                   |               |         |
| Depression and other<br>diagnoses  | 1 (Reference)     |               |         |
| Schizophrenia; bipolar<br>disorder | .67 (0.476-.944)  | 5.25          | 0.022   |

Abbreviations: CI, confidence interval; OR, odds ratio; All  $\chi^2$  tests use 1 degree of freedom
